# Supplementary material
Source: Springer Nature journal article supplement (https://www.springermedizin.de/resource/supplementary/13024_2013_521_MOESM15_ESM.pdf/9644394)

**A***elav-GAL4*BRI<sub>2</sub>-23 x2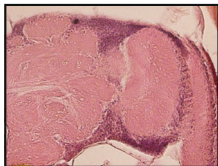A $\beta$ 42 x2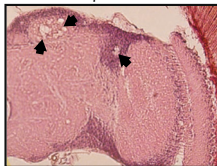

ABri x2

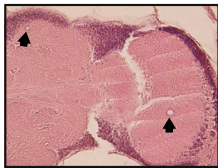

ADan x2

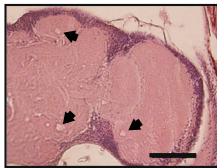**B**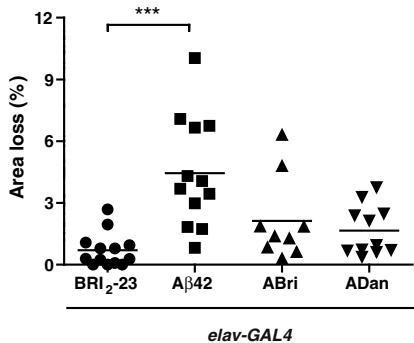

Supplement: MOESM15 [file 9644394]
